# Supplementary material
Source: publisher figshare collection journal article supplement (https://acs.figshare.com/ndownloader/files/12873332)
Supplement: Supplementary file 1 [file 12873332]

## Supporting Information

### Synthesis and Nano-object Assembly of Biomimetic Block Copolymers for Catalytic Silver Nanoparticles

Shinji Sugihara\*, Masahiro Sudo, and Yasushi Maeda

*Department of Applied Chemistry and Biotechnology, Graduate School of Engineering,  
University of Fukui, 3-9-1 Bunkyo, Fukui 910-8507, Japan*

\*Correspondence to Shinji Sugihara (E-mail: sugihara@u-fukui.ac.jp)

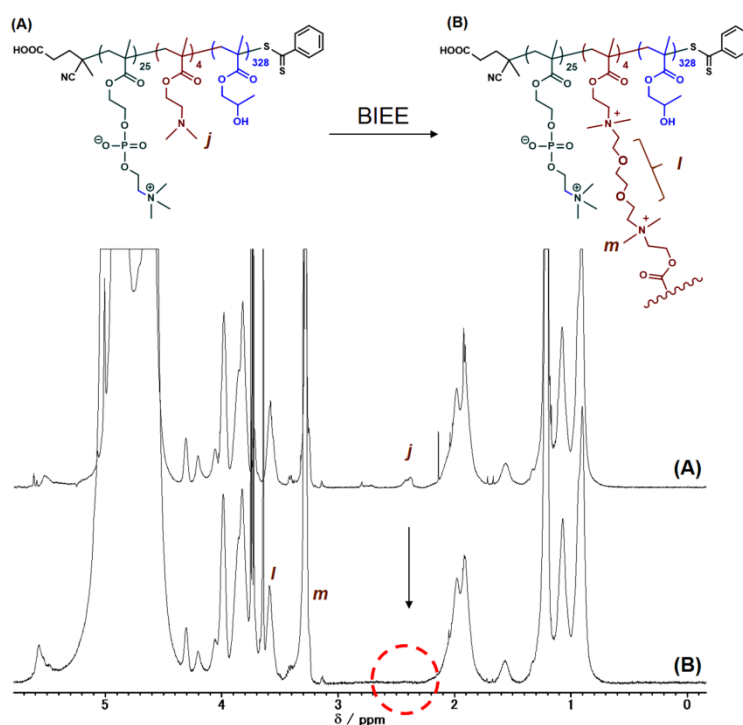

**Figure S1.** <sup>1</sup>H NMR spectra (1.0 wt%, D<sub>2</sub>O at 20 °C) recorded for PMPC<sub>25</sub>-b-PDMA<sub>4</sub>-b-PHPMA<sub>328</sub> jellyfish assemblies (entry 6) (A) before and (B) after cross-linking (quaternization) using BIEE: the integrated areas of signals assigned to the DMA residues (around 2.4 ppm) are decreased after cross-linking. The cross-linking was conducted at room temperature for 48 h using jellyfish assemblies in water (25 w/w% solids concentration) with [BIEE]<sub>0</sub>/[DMA unit]<sub>0</sub> = 1/2 molar ratio. The quaternization of the DMA moiety was determined to be 95%.

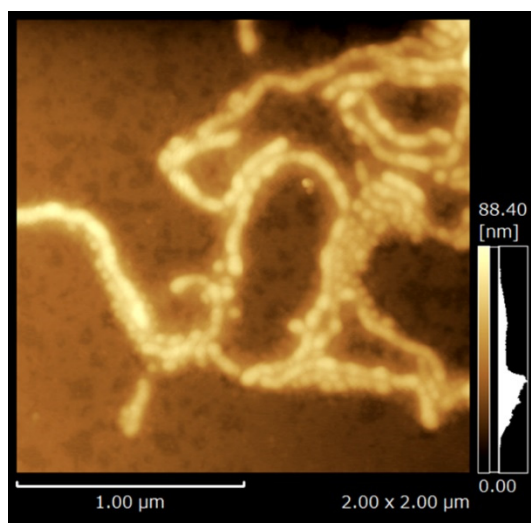

**Figure S2.** DM-AFM (height) image of PMPC<sub>25</sub>-*b*-PDMA<sub>4</sub>-*b*-PHPMA<sub>328</sub> jellyfish assemblies (entry 6) after cross-linking (quaternization) using BIEE in 1:1 methanol/water mixture (w/w).

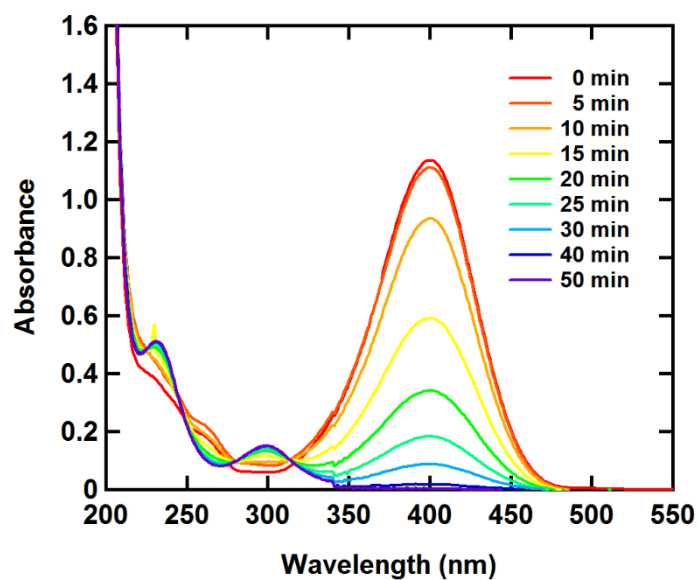

**Figure S3** UV/vis spectra of 4-NP reduced by NaBH<sub>4</sub> catalyzed with Ag-NPs loaded PMPC<sub>25</sub>-*b*-PDMA<sub>4</sub>-*b*-PHPMA<sub>400</sub> vesicles (entry 8) in water.

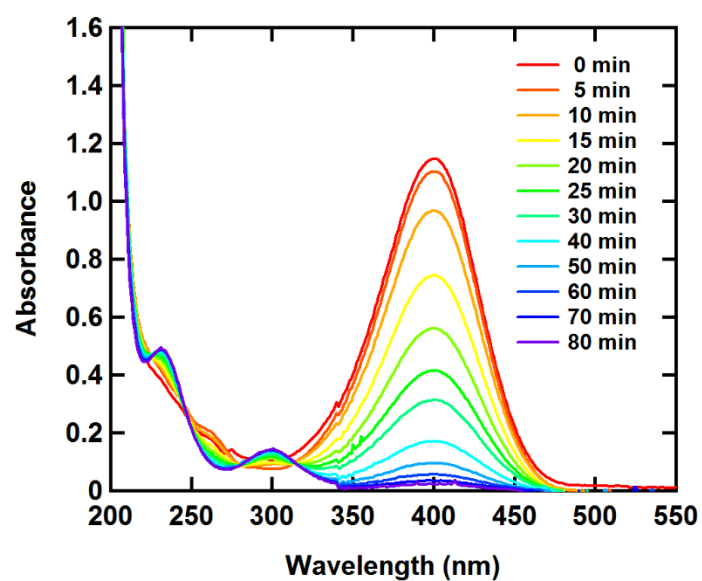

**Figure S4.** UV/vis spectra of 4-NP reduced by NaBH<sub>4</sub> catalyzed with Ag-NPs loaded PMPC<sub>25</sub>-*b*-PDMA<sub>4</sub>-*b*-PHPMA<sub>400</sub> sphere (entry 10) in water.
